# Supplementary material for: Graphene aerogel supported Fe5(PO4)4(OH)3·2H2O microspheres as high performance cathode for lithium ion batteries
Source: Royal Society of Chemistry journal article supplement (doi:10.1039/c3ta14585a), 2013-11-28
Supplement: c3ta14585a.pdf [file c3ta14585a.pdf]

**Electronic Supplementary Information**  
**for**  
**Graphene aerogel supported  $\text{Fe}_5(\text{PO}_4)_4(\text{OH})_3 \cdot 2\text{H}_2\text{O}$**   
**microspheres as high performance cathode for lithium ion**  
**batteries**

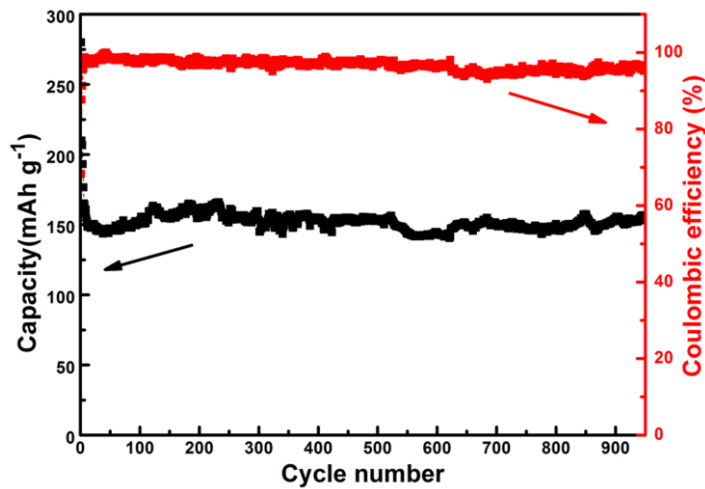

**Fig. S1** Cycling performance of GA/IHPDs hybrids at a current density of  $50 \text{ mA g}^{-1}$  and the corresponding Coulombic efficiency.

**Table S1** Kinetic parameters of IHPDs and GA/IHPDs electrodes

| Samples               | IHPDs-Before | GA/IHPDs-Before | IHPDs-After | GA/IHPDs-After |
|-----------------------|--------------|-----------------|-------------|----------------|
| $R_s (\Omega)$        | 3.4          | 4.1             | 23.9        | 6.7            |
| $R_{ct} (\Omega)$     | 53.9         | 117.7           | 280.1       | 91.3           |
| CPE ( $\mu\text{F}$ ) | 1.95         | 3.06            | 2.23        | 0.81           |

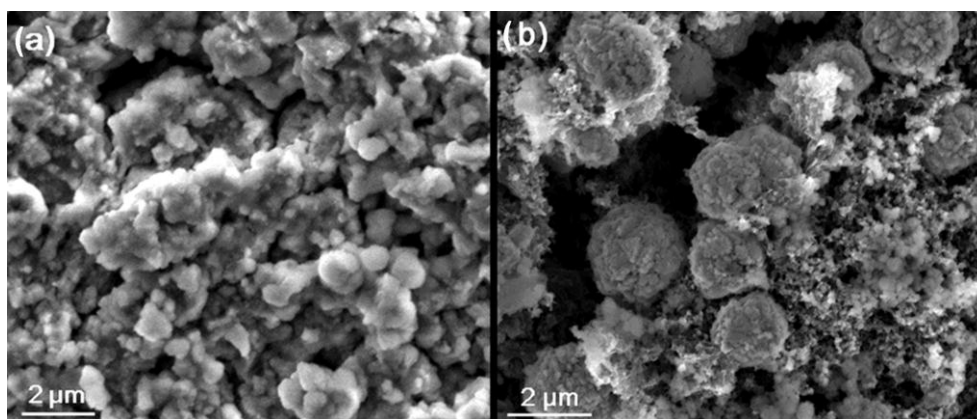

**Fig. S2** Representative SEM images of IHPDs (a) and GA/IHPDs hybrids (b) cathode after 140 discharge–charge cycles.
